# Supplementary material
Source: PubMed Central journal article supplement (PMC6130940)
Supplement: supp_RA118.004709_139192_1_supp_172228_pc6m0b.pdf [file supp_RA118.004709_139192_1_supp_172228_pc6m0b.pdf]

## **Transcriptional regulation of *O*-GlcNAc homeostasis is disrupted in pancreatic cancer**

Kevin Qian, Simeng Wang, Minnie Fu, Jinfeng Zhou, Jay Prakash Singh, Min-Dian Li, Yunfan Yang, Kaisi Zhang, Jing Wu, Yongzhan Nie, Hai-Bin Ruan, Xiaoyong Yang

1. Figure S1-S3
2. Table S1-S7



**Figure S1. Related to Figure 2.** (A) UCSC Genome Browser view of the human *OGT* promoter with corresponding RNA-seq and H3K27ac and transcription factor ChIP-seq data from ENCODE. Notable p300 and C/EBP $\beta$  binding sites boxed in red. (B) Quantification of Flag band intensities from the Western blot in Figure 2D. (C) *Ogt* promoter luciferase assay performed in HEK 293T cells transfected with the indicated plasmids (n = 4). All values represent mean  $\pm$  SEM. \*p < 0.05 by one-way ANOVA with Tukey's multiple comparisons test. (D) Sequence alignment of the human, mouse, and rat *OGT* promoters with the conserved C/EBP $\beta$  binding motif boxed in red. (E) C/EBP $\beta$  binding site consensus sequence with the two mutated bases highlighted in red.

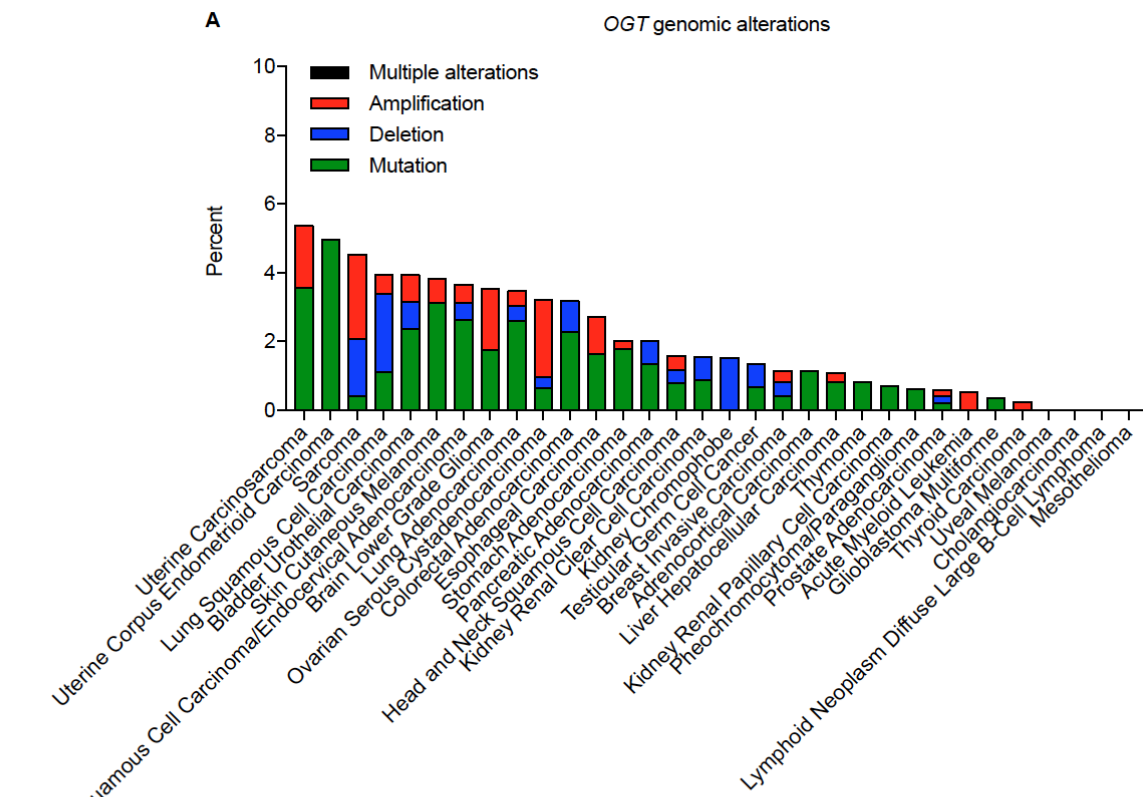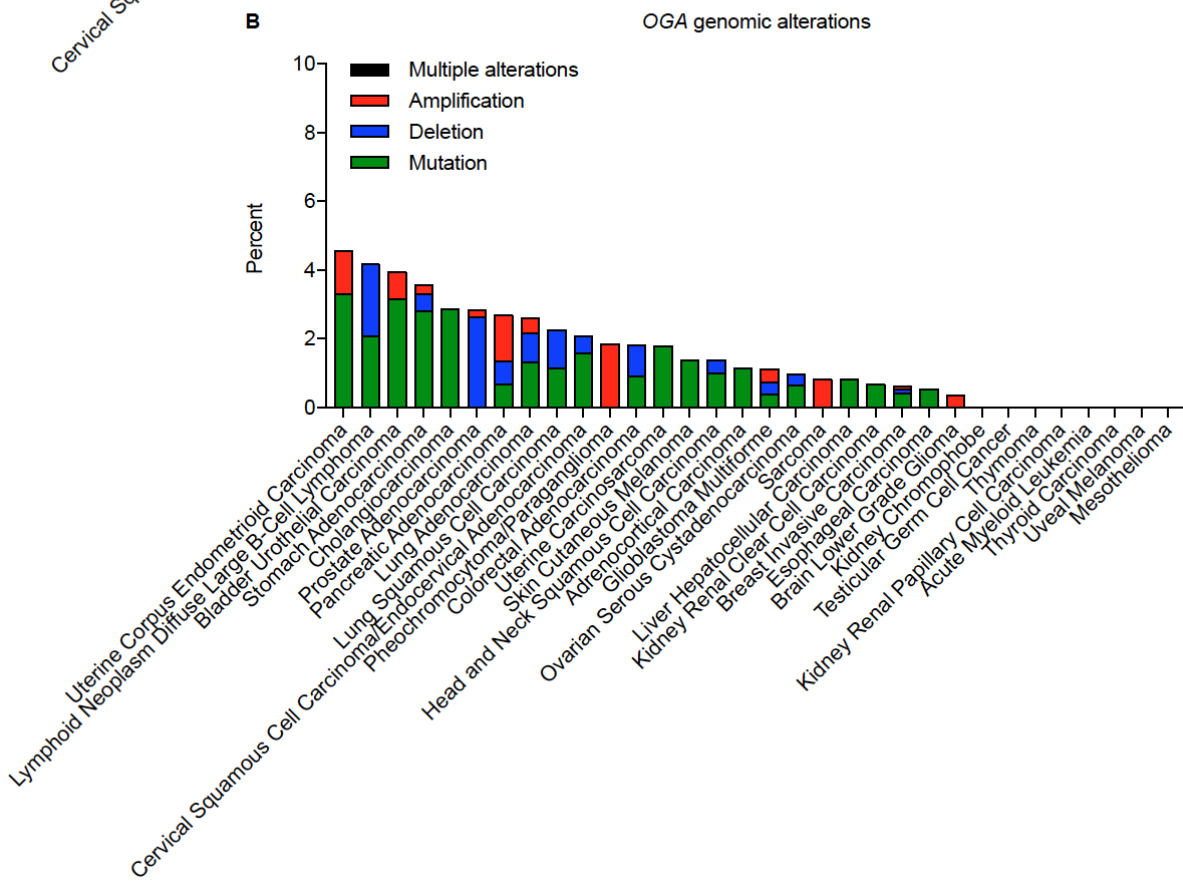

**Figure S2. Related to Figure 3.** Percentage of the indicated cancer types with the indicated genomic alterations in the (A) *OGT* and (B) *OGA* genes.

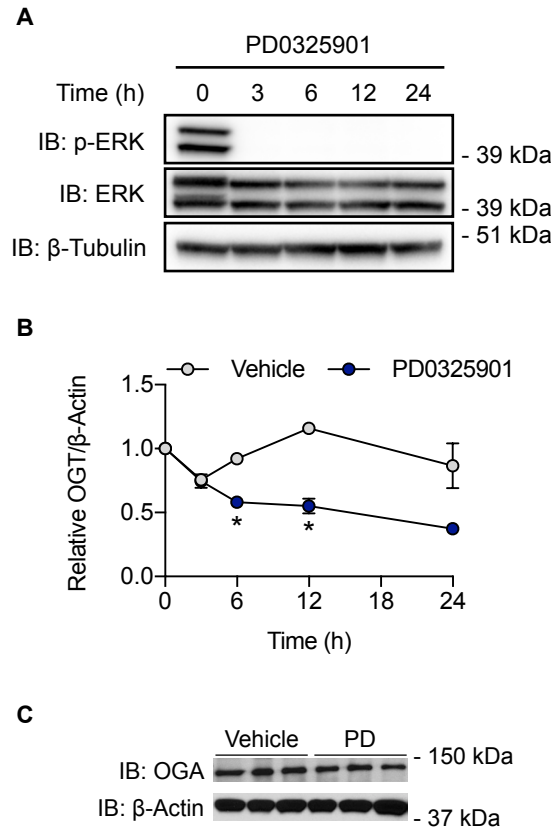

**Figure S3. Related to Figure 5.** (A) Primary mouse PDAC cells were treated with PD0325901 (10  $\mu$ M) for 0, 3, 6, 12, or 24 hr and p-ERK levels were measured by Western blot. (B) Quantification of OGT and  $\beta$ -Actin band intensities from the Western blot in Figure 5F (n = 2). All values represent mean  $\pm$  SEM. \* $p$  < 0.05 by multiple t tests with Holm-Sidak correction for multiple comparisons. (C) Western blot analysis of OGA protein levels in whole cell lysates used for the OGA activity assay in Figure 5G.

**Table S1.** Top genes coexpressed with *OGT* in human, mouse, and rat tissues

| <b>Rank</b> | <b>Human</b>        | <b>Mouse</b>         | <b>Rat</b>          |
|-------------|---------------------|----------------------|---------------------|
| -           | <i>OGT</i>          | <i>Ogt</i>           | <i>Ogt</i>          |
| 1           | <i>DDX17</i>        | <i>Pnlsr</i>         | <i>Ddx17</i>        |
| 2           | <i>MDM4</i>         | <i>Rbm5</i>          | <i>Zfc3h1</i>       |
| 3           | <i>ZFC3H1</i>       | <i>Firre</i>         | <i>Zc3h11a</i>      |
| 4           | <i>RBM5</i>         | <i>Thoc2</i>         | <i>Kdelr3</i>       |
| 5           | <i>DMTF1</i>        | <i>Clk1</i>          | <i>Zranb2</i>       |
| 6           | <i>TTC17</i>        | <i>Zfp871</i>        | <i>Pnlsr</i>        |
| 7           | <i>NKTR</i>         | <i>Abcc5</i>         | <i>Morc3</i>        |
| 8           | <i>ALG13</i>        | <i>Atrx</i>          | <i>Epm2aip1</i>     |
| 9           | <b><i>MGEA5</i></b> | <i>Malat1</i>        | <i>Cspp1</i>        |
| 10          | <i>PNISR</i>        | <i>Ddx17</i>         | <i>Son</i>          |
| ...         | ...                 | ...                  | ...                 |
| 90          | <i>RAPGEF6</i>      | <i>2610008E11Rik</i> | <b><i>Mgea5</i></b> |
| ...         | ...                 | ...                  | ...                 |
| 107         | <i>ATG2B</i>        | <b><i>Mgea5</i></b>  | <i>Casp2</i>        |

**Table S2.** Top genes coexpressed with OGA in human, mouse, and rat tissues

| <b>Rank</b> | <b>Human</b>      | <b>Mouse</b>      | <b>Rat</b>        |
|-------------|-------------------|-------------------|-------------------|
| -           | <i>MGEA5</i>      | <i>Mgea5</i>      | <i>Mgea5</i>      |
| 1           | <i>BTA1F1</i>     | <i>Phf3</i>       | <i>Fyttl1</i>     |
| 2           | <i>YTHDC1</i>     | <i>Kdm3a</i>      | <i>Cttnb1</i>     |
| 3           | <i>CHD2</i>       | <i>Ubxn7</i>      | <i>Adnp</i>       |
| 4           | <i>MDM4</i>       | <i>Zmym2</i>      | <i>Pot1</i>       |
| 5           | <b><i>OGT</i></b> | <i>Csnk1g1</i>    | <i>Zc3h11a</i>    |
| 6           | <i>DMTF1</i>      | <i>Sf3b1</i>      | <i>Ddx3x</i>      |
| 7           | <i>NKTR</i>       | <i>Ctr9</i>       | <i>Rab6a</i>      |
| 8           | <i>ZFC3H1</i>     | <i>Sbno1</i>      | <i>Gdi2</i>       |
| 9           | <i>RBM5</i>       | <i>Nbr1</i>       | <i>Crk</i>        |
| 10          | <i>CLK1</i>       | <i>Rlf</i>        | <i>Slc25a36</i>   |
| ...         | ...               | ...               | ...               |
| 40          | <i>HERC4</i>      | <i>Kctd18</i>     | <b><i>Ogt</i></b> |
| ...         | ...               | ...               | ...               |
| 61          | <i>STK4</i>       | <b><i>Ogt</i></b> | <i>Atp6ap1</i>    |



**Table S3.** Correlation between *OGT* and *OGA* mRNA expression in human cancers

| <b>Cancer Type</b>                                               | <b>Pearson</b> | <b>Spearman</b> | <b>n</b>   |
|------------------------------------------------------------------|----------------|-----------------|------------|
| Uveal Melanoma                                                   | 0.72           | 0.76            | 80         |
| <b>Pancreatic Adenocarcinoma</b>                                 | <b>0.70</b>    | <b>0.61</b>     | <b>179</b> |
| Thyroid Carcinoma                                                | 0.68           | 0.62            | 509        |
| Acute Myeloid Leukemia                                           | 0.61           | 0.69            | 173        |
| Adrenocortical Carcinoma                                         | 0.61           | 0.50            | 79         |
| Sarcoma                                                          | 0.57           | 0.54            | 263        |
| Bladder Urothelial Carcinoma                                     | 0.53           | 0.46            | 408        |
| Skin Cutaneous Melanoma                                          | 0.53           | 0.56            | 472        |
| Thymoma                                                          | 0.53           | 0.61            | 120        |
| Stomach Adenocarcinoma                                           | 0.51           | 0.56            | 415        |
| Testicular Germ Cell Cancer                                      | 0.49           | 0.55            | 156        |
| Kidney Renal Clear Cell Carcinoma                                | 0.47           | 0.52            | 534        |
| Cholangiocarcinoma                                               | 0.46           | 0.39            | 36         |
| Lymphoid Neoplasm Diffuse Large B-Cell Lymphoma                  | 0.45           | 0.64            | 48         |
| Uterine Carcinosarcoma                                           | 0.45           | 0.34            | 57         |
| Kidney Renal Papillary Cell Carcinoma                            | 0.44           | 0.59            | 291        |
| Prostate Adenocarcinoma                                          | 0.43           | 0.47            | 498        |
| Breast Invasive Carcinoma                                        | 0.43           | 0.46            | 1100       |
| Brain Lower Grade Glioma                                         | 0.42           | 0.42            | 530        |
| Pheochromocytoma and Paraganglioma                               | 0.42           | 0.43            | 184        |
| Esophageal Carcinoma                                             | 0.42           | 0.42            | 185        |
| Lung Adenocarcinoma                                              | 0.41           | 0.49            | 517        |
| Glioblastoma Multiforme                                          | 0.41           | 0.41            | 166        |
| Head and Neck Squamous Cell Carcinoma                            | 0.41           | 0.42            | 522        |
| Uterine Corpus Endometrioid Carcinoma                            | 0.40           | 0.41            | 333        |
| Colorectal Adenocarcinoma                                        | 0.38           | 0.42            | 382        |
| Cervical Squamous Cell Carcinoma and Endocervical Adenocarcinoma | 0.36           | 0.44            | 306        |
| Ovarian Serous Cystadenocarcinoma                                | 0.35           | 0.44            | 307        |
| Liver Hepatocellular Carcinoma                                   | 0.35           | 0.35            | 373        |
| Lung Squamous Cell Carcinoma                                     | 0.33           | 0.54            | 501        |
| Mesothelioma                                                     | 0.31           | 0.20            | 87         |
| Kidney Chromophobe                                               | -0.05          | 0.09            | 66         |

**Table S4.** Comparison of OGT, OGA, and RL2 levels in normal pancreas and PDAC

| Tissue | OGT        |           |         | OGA        |           |         | RL2        |           |         |
|--------|------------|-----------|---------|------------|-----------|---------|------------|-----------|---------|
|        | Low (-, +) | High (++) | p*      | Low (-, +) | High (++) | p*      | Low (-, +) | High (++) | p*      |
| Normal | 73         | 8         | <0.0001 | 60         | 21        | <0.0001 | 62         | 19        | <0.0001 |
| PDAC   | 23         | 58        |         | 15         | 66        |         | 20         | 61        |         |

\*Fisher's exact test

**Table S5.** Correlation between OGT and OGA levels in PDAC

| OGT        | OGA        |           |
|------------|------------|-----------|
|            | Low (-, +) | High (++) |
| Low (-, +) | 10         | 13        |
| High (++)  | 5          | 53        |

Spearman r = 0.405, p < 0.001

**Table S6.** Correlation between OGT and RL2 levels in PDAC

| OGT        | RL2        |           |
|------------|------------|-----------|
|            | Low (-, +) | High (++) |
| Low (-, +) | 15         | 8         |
| High (++)  | 5          | 53        |

Spearman r = 0.592, p < 0.001

**Table S7.** Correlation between OGA and RL2 levels in PDAC

| OGA        | RL2        |           |
|------------|------------|-----------|
|            | Low (-, +) | High (++) |
| Low (-, +) | 8          | 7         |
| High (++)  | 12         | 54        |

Spearman r = 0.317, p < 0.001
